# Supplementary material
Source: PubMed Central journal article supplement (PMC3536147)
Supplement: IAI.00768-12_zii999099947so1.pdf [file IAI.00768-12_zii999099947so1.pdf]

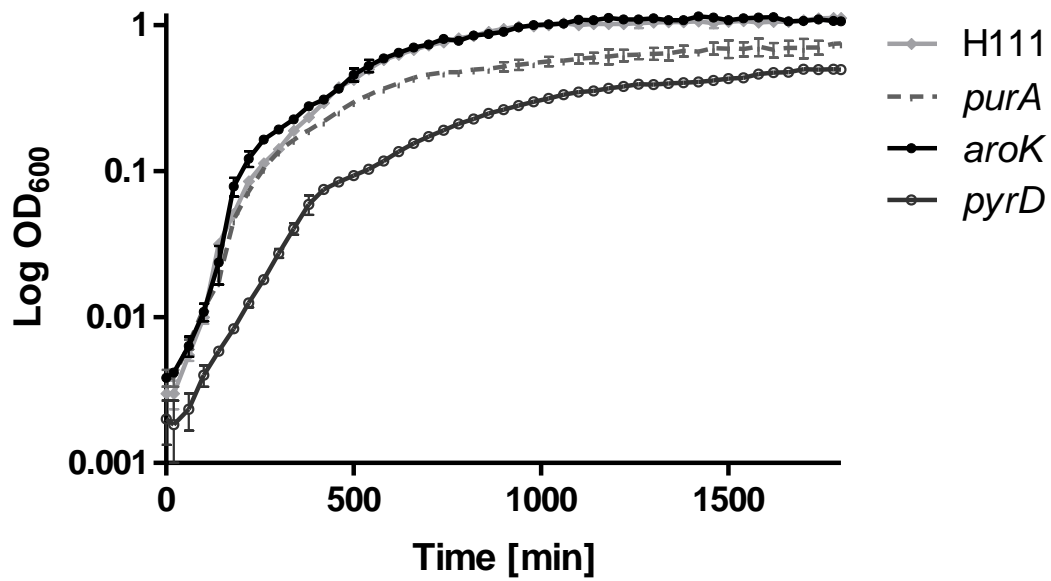

Fig. S1. Mutant D6 (*pyrD*) exhibits a reduced growth rate in LB medium. The wild type strain and selected mutant strains were cultured in twenty-four well plates at 37°C. Growth was monitored by measurement of optical density at 600 nm (OD<sub>600</sub>) using a microtitre plate reader (SynergyTM HT, MWG Biotech, Germany).
