# Supplementary material
Source: PubMed Central journal article supplement (PMC3536147)
Supplement: IAI.00768-12_zii999099947so2.pdf [file IAI.00768-12_zii999099947so2.pdf]

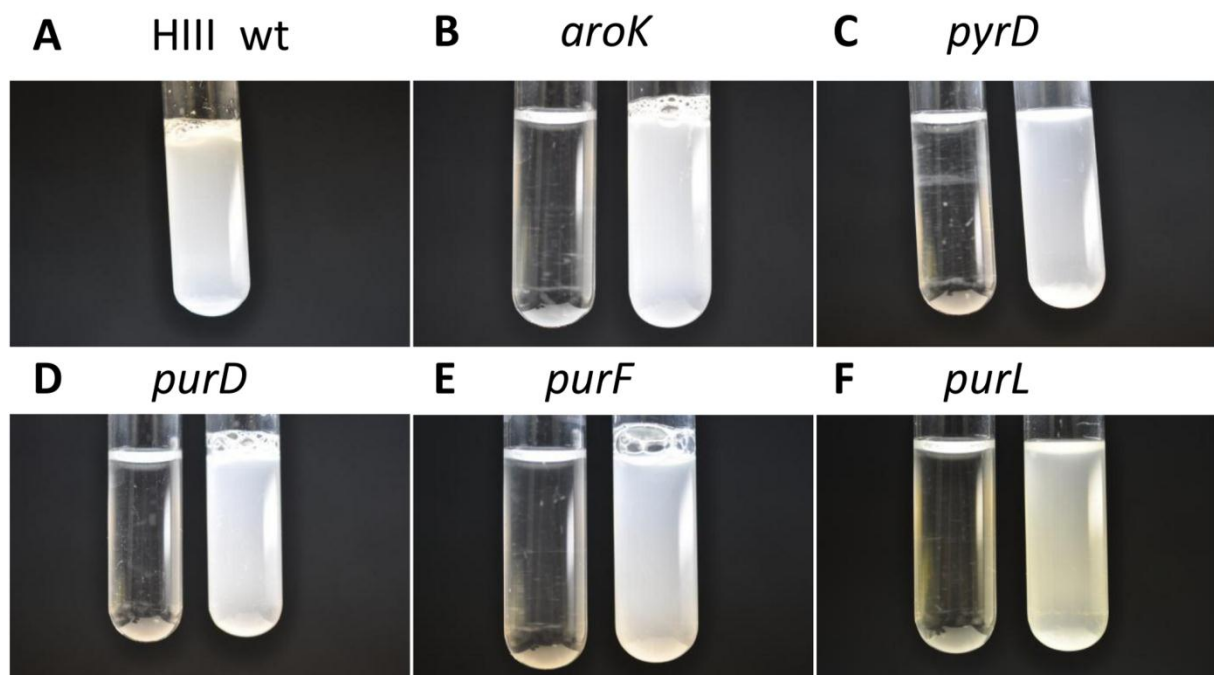

Fig. S2. Growth of *B. cenocepacia* H111 wild-type, attenuated auxotrophic Tn5-mutants and heterologously complemented strains in ABC minimal medium. (A) *B. cenocepacia* H111 wild-type, (B) *aroK* mutant and heterologously complemented *aroK* mutant, (C) *pyrD* mutant and heterologously complemented *pyrD* mutant, (D) *purD* mutant and heterologously complemented *purD* mutant, (E) *purF* mutant and heterologously complemented *purF* mutant (F) *purL* mutant and heterologously complemented *purL* mutant.
